# Supplementary material
Source: Springer Nature journal article supplement (https://www.springermedizin.de/resource/supplementary/13098_2011_132_MOESM1_ESM.pdf/9670574)

body weight(g)

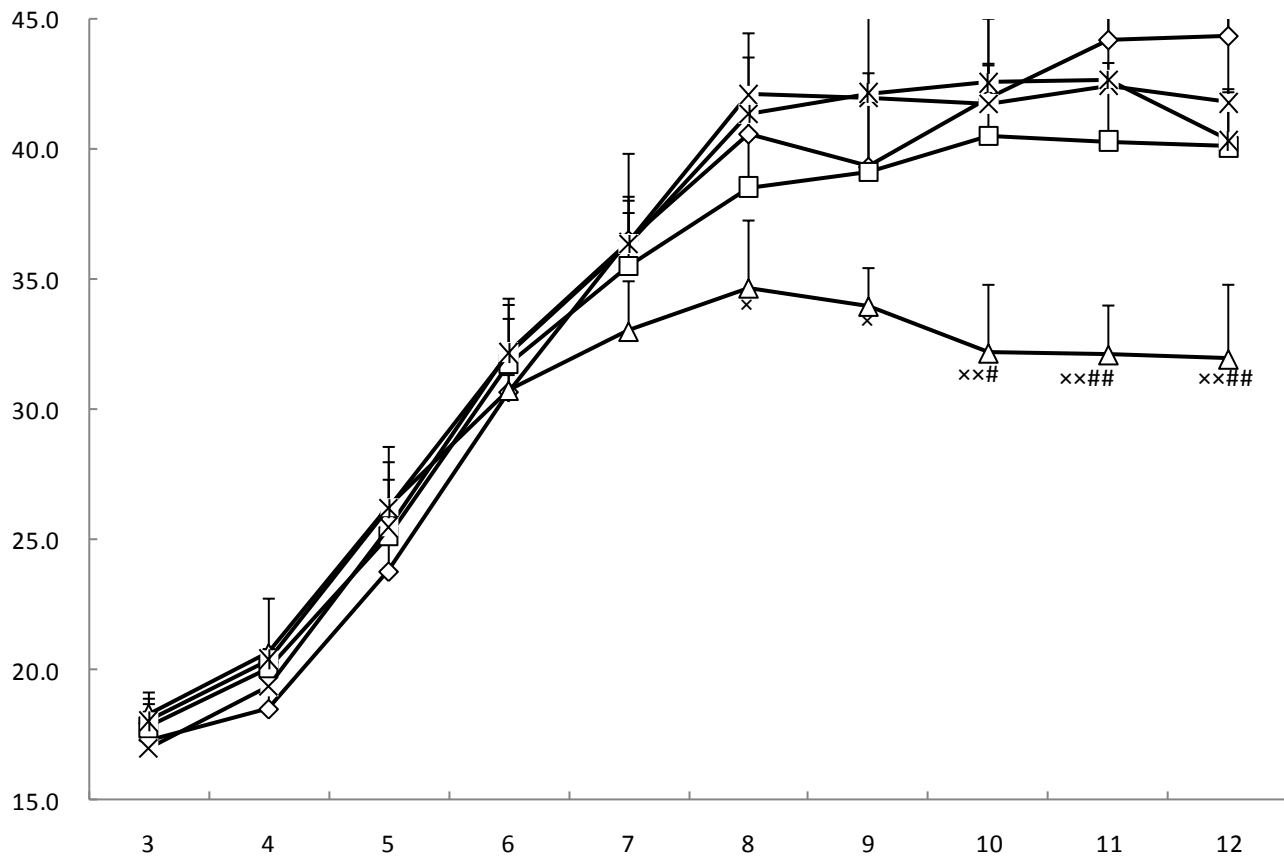

Time(week)

- ◇ Control+NS
- DM+NS
- △ Pre-treatment
- × DM+LC(H)
- \* DM+LC(L)

Supplement: MOESM1 [file 9670574]
